# Supplementary material
Source: MDPI journal article supplement (https://www.mdpi.com/2504-477X/8/4/131)
Supplement: s1 [file s1]

Archive with 2 entries (2 files):
- PRISMA_Checklist_FNeumann.pdf
- PRISMA_Flowdiagram_FNeumann.pdf
