# Supplementary material
Source: MDPI journal article supplement (https://www.mdpi.com/2504-477X/8/4/131)

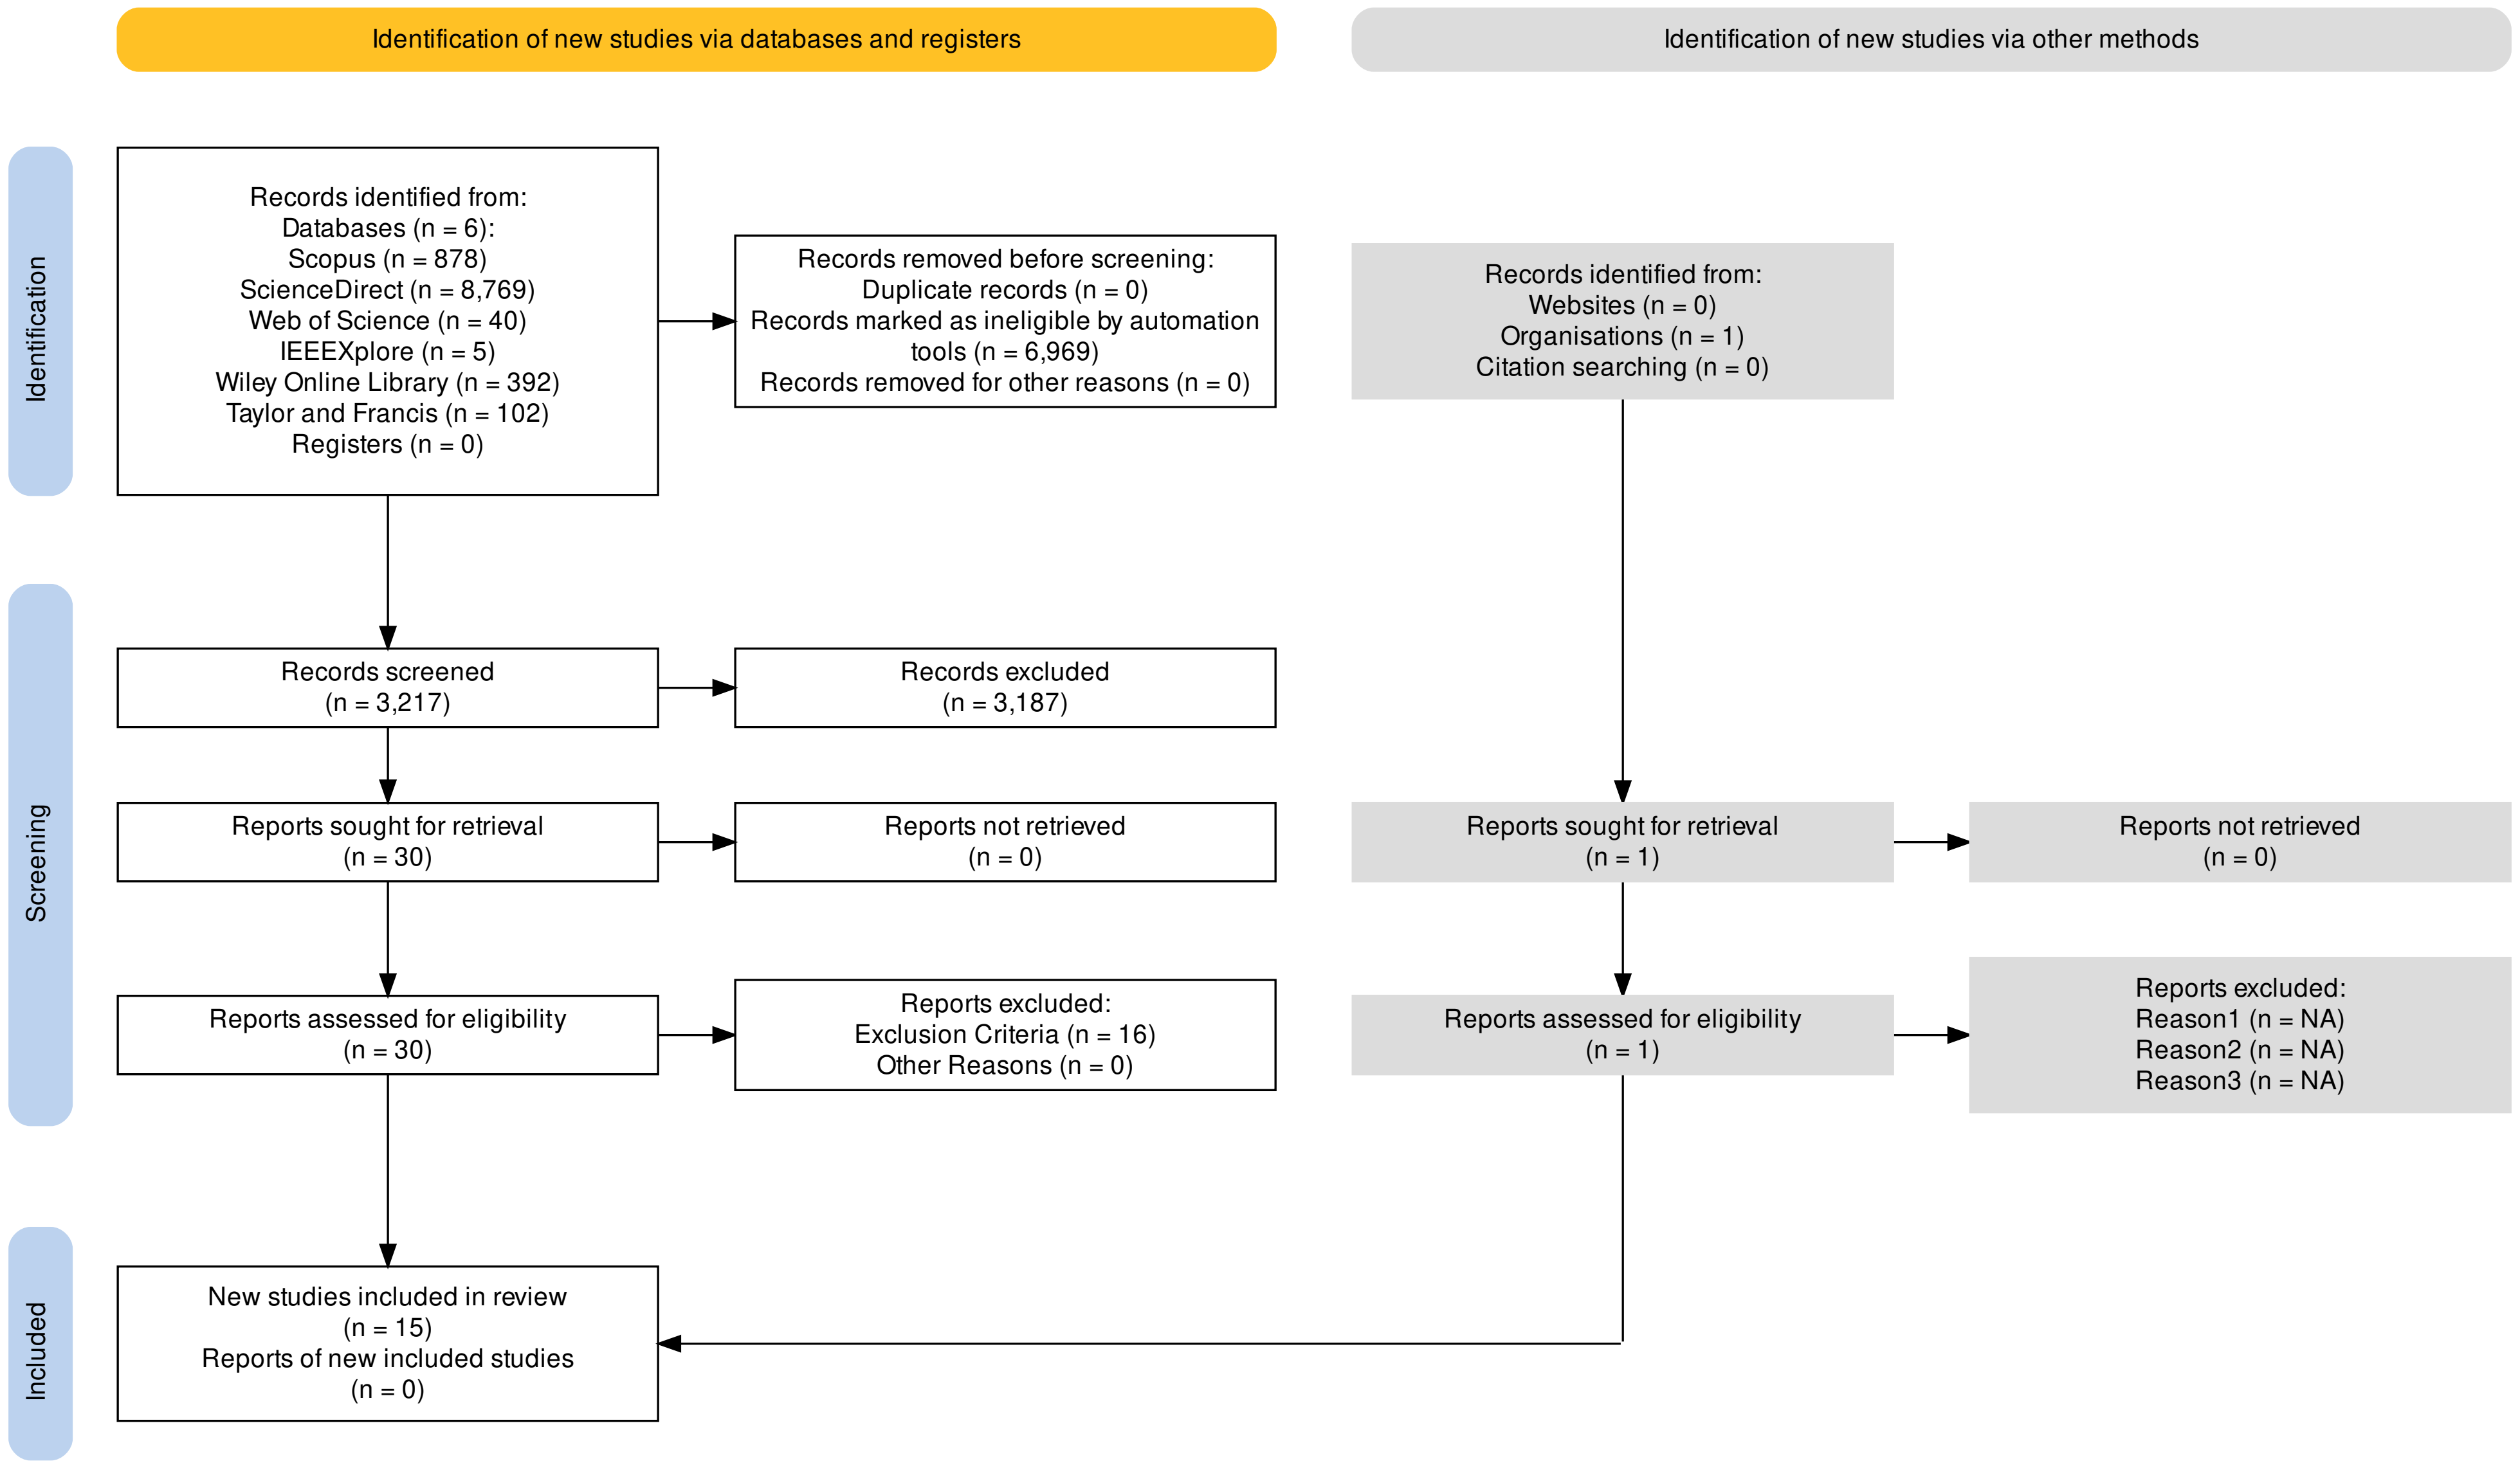

Supplement: s1 [file s1 › PRISMA_Flowdiagram_FNeumann.pdf]
